# Supplementary material
Source: publisher figshare collection journal article supplement (https://tandf.figshare.com/ndownloader/files/31585126)
Supplement: Supplementary file 1 [file 31585126]

**Supplemental Table 1:** International Classification of Diseases, 9th (ICD-9) diagnosis codes used to identify all ocular disease in the first year of life among Olmsted County, Minnesota residents.

| ICD-9 Code | Code Descriptions |
| --- | --- |
| 360.0 | PURULENT ENDOPHTHALMITIS |
| 360.00 | PURULENT ENDOPHTHALMITIS, UNSPECIFIED |
| 360.01 | ACUTE ENDOPHTHALMITIS |
| 360.02 | PANOPHTHALMITIS |
| 360.03 | CHRONIC ENDOPHTHALMITIS |
| 360.04 | VITREOUS ABSCESS |
| 360.1 | OTHER ENDOPHTHALMITIS |
| 360.11 | SYMPATHETIC UVEITIS |
| 360.12 | PANUVEITIS |
| 360.13 | PARASITIC ENDOPHTHALMITIS NOS |
| 360.14 | OPHTHALMIA NODOSA |
| 360.19 | OTHER ENDOPHTHALMITIS |
| 360.2 | DEGENERATIVE DISORDERS OF GLOBE |
| 360.20 | DEGENERATIVE DISORDER OF GLOBE, UNSPECIFIED |
| 360.21 | PROGRESSIVE HIGH (DEGENERATIVE) MYOPIA |
| 360.23 | SIDEROSIS OF GLOBE |
| 360.24 | OTHER METALLOSIS OF GLOBE |
| 360.29 | OTHER DEGENERATIVE DISORDERS OF GLOBE |
| 360.3 | HYPOTONY OF EYE |
| 360.30 | HYPOTONY OF EYE, UNSPECIFIED |
| 360.31 | PRIMARY HYPOTONY OF EYE |
| 360.32 | OCULAR FISTULA CAUSING HYPOTONY |
| 360.33 | HYPOTONY ASSOCIATED WITH OTHER OCULAR DISORDERS |
| 360.34 | FLAT ANTERIOR CHAMBER OF EYE |
| 360.4 | DEGENERATED CONDITIONS OF GLOBE |
| 360.40 | DEGENERATED GLOBE OR EYE, UNSPECIFIED |
| 360.41 | BLIND HYPOTENSIVE EYE |
| 360.42 | BLIND HYPERTENSIVE EYE |
| 360.43 | HEMOPHTHALMOS, EXCEPT CURRENT INJURY |
| 360.44 | LEUCOCORIA |
| 360.5 | RETAINED (OLD) INTRAOCULAR FOREIGN BODY, MAGNETIC |
| 360.50 | FOREIGN BODY, MAGNETIC, INTRAOCULAR, UNSPECIFIED |
| 360.51 | FOREIGN BODY, MAGNETIC, IN ANTERIOR CHAMBER OF EYE |
| 360.52 | FOREIGN BODY, MAGNETIC, IN IRIS OR CILIARY BODY |
| 360.53 | FOREIGN BODY, MAGNETIC, IN LENS |
| 360.54 | FOREIGN BODY, MAGNETIC, IN VITREOUS |
| 360.55 | FOREIGN BODY, MAGNETIC, IN POSTERIOR WALL |
| 360.59 | INTRAOCULAR FOREIGN BODY, MAGNETIC, IN OTHER OR MULTIPLE SITES |
| 360.6 | RETAINED (OLD) INTRAOCULAR FOREIGN BODY, NONMAGNETIC |
| 360.60 | FOREIGN BODY, INTRAOCULAR, UNSPECIFIED |
| 360.61 | FOREIGN BODY IN ANTERIOR CHAMBER |
| 360.62 | FOREIGN BODY IN IRIS OR CILIARY BODY |
| 360.63 | FOREIGN BODY IN LENS |
| 360.64 | FOREIGN BODY IN VITREOUS |
| 360.65 | FOREIGN BODY IN POSTERIOR WALL OF EYE |
| 360.69 | INTRAOCULAR FOREIGN BODY IN OTHER OR MULTIPLE SITES |
| 360.8 | OTHER DISORDERS OF GLOBE |
| 360.81 | LUXATION OF GLOBE |
| 360.89 | OTHER DISORDERS OF GLOBE |
| 360.9 | UNSPECIFIED DISORDER OF GLOBE |
| 361 | RETINAL DETACHMENTS AND DEFECTS |
| 361.0 | RETINAL DETACHMENT WITH RETINAL DEFECT |
| 361.00 | RETINAL DETACHMENT WITH RETINAL DEFECT, UNSPECIFIED |
| 361.01 | RECENT RETINAL DETACHMENT, PARTIAL, WITH SINGLE DEFECT |
| 361.02 | RECENT RETINAL DETACHMENT, PARTIAL, WITH MULTIPLE DEFECTS |
| 361.03 | RECENT RETINAL DETACHMENT, PARTIAL, WITH GIANT TEAR |
| 361.04 | RECENT RETINAL DETACHMENT, PARTIAL, WITH RETINAL DIALYSIS |
| 361.05 | RECENT RETINAL DETACHMENT, TOTAL OR SUBTOTAL |
| 361.06 | OLD RETINAL DETACHMENT, PARTIAL |
| 361.07 | OLD RETINAL DETACHMENT, TOTAL OR SUBTOTAL |
| 361.1 | RETINOSCHISIS AND RETINAL CYSTS |
| 361.10 | RETINOSCHISIS, UNSPECIFIED |
| 361.11 | FLAT RETINOSCHISIS |
| 361.12 | BULLOUS RETINOSCHISIS |
| 361.13 | PRIMARY RETINAL CYSTS |
| 361.14 | SECONDARY RETINAL CYSTS |
| 361.19 | OTHER RETINOSCHISIS AND RETINAL CYSTS |
| 361.2 | SEROUS RETINAL DETACHMENT |
| 361.3 | RETINAL DEFECTS WITHOUT DETACHMENT |
| 361.30 | RETINAL DEFECT, UNSPECIFIED |
| 361.31 | ROUND HOLE OF RETINA WITHOUT DETACHMENT |
| 361.32 | HORSESHOE TEAR OF RETINA WITHOUT DETACHMENT |
| 361.33 | MULTIPLE DEFECTS OF RETINA WITHOUT DETACHMENT |
| 361.8 | OTHER FORMS OF RETINAL DETACHMENT |
| 361.81 | TRACTION DETACHMENT OF RETINA |
| 361.89 | OTHER FORMS OF RETINAL DETACHMENT |
| 361.9 | UNSPECIFIED RETINAL DETACHMENT |
| 362 | OTHER RETINAL DISORDERS |
| 362.0 | DIABETIC RETINOPATHY |
| 362.01 | BACKGROUND DIABETIC RETINOPATHY |
| 362.02 | PROLIFERATIVE DIABETIC RETINOPATHY |
| 362.03 | NONPROLIFERATIVE DIABETIC RETINOPATHY NOS |
| 362.04 | MILD NONPROLIFERATIVE DIABETIC RETINOPATHY |
| 362.05 | MODERATE NONPROLIFERATIVE DIABETIC RETINOPATHY |
| 362.06 | SEVERE NONPROLIFERATIVE DIABETIC RETINOPATHY |
| 362.07 | DIABETIC MACULAR EDEMA |
| 362.1 | OTHER BACKGROUND RETINOPATHY AND RETINAL VASCULAR CHANGES |
| 362.10 | BACKGROUND RETINOPATHY, UNSPECIFIED |
| 362.11 | HYPERTENSIVE RETINOPATHY |
| 362.12 | EXUDATIVE RETINOPATHY |
| 362.13 | CHANGES IN VASCULAR APPEARANCE OF RETINA |
| 362.14 | RETINAL MICROANEURYSMS NOS |
| 362.15 | RETINAL TELANGIECTASIA |
| 362.16 | RETINAL NEOVASCULARIZATION NOS |
| 362.17 | OTHER INTRARETINAL MICROVASCULAR ABNORMALITIES |
| 362.18 | RETINAL VASCULITIS |
| 362.2 | OTHER PROLIFERATIVE RETINOPATHY |
| 362.20 | RETINOPATHY OF PREM NOS |
| 362.21 | RETROLENTAL FIBROPLASIA |
| 362.22 | RETINOPATH OF PREM STG 0 |
| 362.23 | RETINOPATH OF PREM STG 1 |
| 362.24 | RETINOPATH OF PREM STG 2 |
| 362.25 | RETINOPATH OF PREM STG 3 |
| 362.26 | RETINOPATH OF PREM STG 4 |
| 362.27 | RETINOPATH OF PREM STG 5 |
| 362.29 | OTHER NONDIABETIC PROLIFERATIVE RETINOPATHY |
| 362.3 | RETINAL VASCULAR OCCLUSION |
| 362.30 | RETINAL VASCULAR OCCLUSION, UNSPECIFIED |
| 362.31 | CENTRAL RETINAL ARTERY OCCLUSION |
| 362.32 | RETINAL ARTERIAL BRANCH OCCLUSION |
| 362.33 | PARTIAL RETINAL ARTERIAL OCCLUSION |
| 362.34 | TRANSIENT RETINAL ARTERIAL OCCLUSION |
| 362.35 | CENTRAL RETINAL VEIN OCCLUSION |
| 362.36 | VENOUS TRIBUTARY (BRANCH) OCCLUSION OF RETINA |
| 362.37 | VENOUS ENGORGEMENT OF RETINA |
| 362.4 | SEPARATION OF RETINAL LAYERS |
| 362.40 | RETINAL LAYER SEPARATION, UNSPECIFIED |
| 362.41 | CENTRAL SEROUS RETINOPATHY |
| 362.42 | SEROUS DETACHMENT OF RETINAL PIGMENT EPITHELIUM |
| 362.43 | HEMORRHAGIC DETACHMENT OF RETINAL PIGMENT EPITHELIUM |
| 362.5 | DEGENERATION OF MACULA AND POSTERIOR POLE OF RETINA |
| 362.50 | MACULAR DEGENERATION (SENILE) OF RETINA, UNSPECIFIED |
| 362.51 | NONEXUDATIVE SENILE MACULAR DEGENERATION OF RETINA |
| 362.52 | EXUDATIVE SENILE MACULAR DEGENERATION OF RETINA |
| 362.53 | CYSTOID MACULAR DEGENERATION OF RETINA |
| 362.54 | MACULAR CYST, HOLE, OR PSEUDOHOLE OF RETINA |
| 362.55 | TOXIC MACULOPATHY OF RETINA |
| 362.56 | MACULAR PUCKERING OF RETINA |
| 362.57 | DRUSEN (DEGENERATIVE) OF RETINA |
| 362.6 | PERIPHERAL RETINAL DEGENERATIONS |
| 362.60 | PERIPHERAL RETINAL DEGENERATION, UNSPECIFIED |
| 362.61 | PAVING STONE DEGENERATION OF RETINA |
| 362.62 | MICROCYSTOID DEGENERATION OF RETINA |
| 362.63 | LATTICE DEGENERATION OF RETINA |
| 362.64 | SENILE RETICULAR DEGENERATION OF RETINA |
| 362.65 | SECONDARY PIGMENTARY DEGENERATION OF RETINA |
| 362.66 | SECONDARY VITREORETINAL DEGENERATIONS |
| 362.7 | HEREDITARY RETINAL DYSTROPHIES |
| 362.70 | HEREDITARY RETINAL DYSTROPHY, UNSPECIFIED |
| 362.71 | RETINAL DYSTROPHY IN SYSTEMIC OR CEREBRORETINAL LIPIDOSES |
| 362.72 | RETINAL DYSTROPHY IN OTHER SYSTEMIC DISORDERS AND SYNDROMES |
| 362.73 | VITREORETINAL DYSTROPHIES |
| 362.74 | PIGMENTARY RETINAL DYSTROPHY |
| 362.75 | OTHER DYSTROPHIES PRIMARILY INVOLVING THE SENSORY RETINA |
| 362.76 | DYSTROPHIES PRIMARILY INVOLVING THE RETINAL PIGMENT EPITHELIUM |
| 362.77 | RETINAL DYSTROPHIES PRIMARILY INVOLVING BRUCH'S MEMBRANE |
| 362.8 | OTHER RETINAL DISORDERS |
| 362.81 | RETINAL HEMORRHAGE |
| 362.82 | RETINAL EXUDATES AND DEPOSITS |
| 362.83 | RETINAL EDEMA |
| 362.84 | RETINAL ISCHEMIA |
| 362.85 | RETINAL NERVE FIBER BUNDLE DEFECTS |
| 362.89 | OTHER RETINAL DISORDERS |
| 362.9 | UNSPECIFIED RETINAL DISORDER |
| 363 | CHORIORETINAL INFLAMMATIONS, SCARS, AND OTHER DISORDERS OF CHOROID |
| 363.0 | FOCAL CHORIORETINITIS AND FOCAL RETINOCHOROIDITIS |
| 363.00 | FOCAL CHORIORETINITIS, UNSPECIFIED |
| 363.01 | FOCAL CHOROIDITIS AND CHORIORETINITIS, JUXTAPAPILLARY |
| 363.03 | FOCAL CHOROIDITIS AND CHORIORETINITIS OF OTHER POSTERIOR POLE |
| 363.04 | FOCAL CHOROIDITIS AND CHORIORETINITIS, PERIPHERAL |
| 363.05 | FOCAL RETINITIS AND RETINOCHOROIDITIS, JUXTAPAPILLARY |
| 363.06 | FOCAL RETINITIS AND RETINOCHOROIDITIS, MACULAR OR PARAMACULAR |
| 363.07 | FOCAL RETINITIS AND RETINOCHOROIDITIS OF OTHER POSTERIOR POLE |
| 363.08 | FOCAL RETINITIS AND RETINOCHOROIDITIS, PERIPHERAL |
| 363.1 | DISSEMINATED CHORIORETINITIS AND DISSEMINATED RETINO- CHOROIDITIS |
| 363.10 | DISSEMINATED CHORIORETINITIS, UNSPECIFIED |
| 363.11 | DISSEMINATED CHOROIDITIS AND CHORIORETINITIS, POSTERIOR POLE |
| 363.12 | DISSEMINATED CHOROIDITIS AND CHORIORETINITIS, PERIPHERAL |
| 363.13 | DISSEMINATED CHOROIDITIS AND CHORIORETINITIS, GENERALIZED |
| 363.14 | DISSEMINATED RETINITIS AND RETINOCHOROIDITIS, METASTATIC |
| 363.15 | DISSEMINATED RETINITIS AND RETINOCHOROIDITIS, PIGMENT EPITHELIOPATHY |
| 363.2 | OTHER AND UNSPECIFIED FORMS OF CHORIORETINITIS AND RETINOCHOROIDITIS |
| 363.20 | CHORIORETINITIS, UNSPECIFIED |
| 363.21 | PARS PLANITIS |
| 363.22 | HARADA'S DISEASE |
| 363.3 | CHORIORETINAL SCARS |
| 363.30 | CHORIORETINAL SCAR, UNSPECIFIED |
| 363.31 | SOLAR RETINOPATHY |
| 363.32 | OTHER MACULAR SCARS OF RETINA |
| 363.33 | OTHER SCARS OF POSTERIOR POLE OF RETINA |
| 363.34 | PERIPHERAL SCARS OF RETINA |
| 363.35 | DISSEMINATED SCARS OF RETINA |
| 363.4 | CHOROIDAL DEGENERATIONS |
| 363.40 | CHOROIDAL DEGENERATION, UNSPECIFIED |
| 363.41 | SENILE ATROPHY OF CHOROID |
| 363.42 | DIFFUSE SECONDARY ATROPHY OF CHOROID |
| 363.43 | ANGIOID STREAKS OF CHOROID |
| 363.5 | HEREDITARY CHOROIDAL DYSTROPHIES |
| 363.50 | HEREDITARY CHOROIDAL DYSTROPHY OR ATROPHY, UNSPECIFIED |
| 363.51 | CIRCUMPAPILLARY DYSTROPHY OF CHOROID, PARTIAL |
| 363.52 | CIRCUMPAPILLARY DYSTROPHY OF CHOROID, TOTAL |
| 363.53 | CENTRAL DYSTROPHY OF CHOROID, PARTIAL |
| 363.54 | CENTRAL CHOROIDAL ATROPHY, TOTAL |
| 363.55 | CHOROIDEREMIA |
| 363.56 | OTHER DIFFUSE OR GENERALIZED DYSTROPHY OF CHOROID, PARTIAL |
| 363.57 | OTHER DIFFUSE OR GENERALIZED DYSTROPHY OF CHOROID, TOTAL |
| 363.6 | CHOROIDAL HEMORRHAGE AND RUPTURE |
| 363.61 | CHOROIDAL HEMORRHAGE, UNSPECIFIED |
| 363.62 | EXPULSIVE CHOROIDAL HEMORRHAGE |
| 363.63 | CHOROIDAL RUPTURE |
| 363.7 | CHOROIDAL DETACHMENT |
| 363.70 | CHOROIDAL DETACHMENT, UNSPECIFIED |
| 363.71 | SEROUS CHOROIDAL DETACHMENT |
| 363.72 | HEMORRHAGIC CHOROIDAL DETACHMENT |
| 363.8 | OTHER DISORDERS OF CHOROID |
| 363.9 | UNSPECIFIED DISORDER OF CHOROID |
| 364 | DISORDERS OF IRIS AND CILIARY BODY |
| 364.0 | ACUTE AND SUBACUTE IRIDOCYCLITIS |
| 364.00 | ACUTE AND SUBACUTE IRIDOCYCLITIS, UNSPECIFIED |
| 364.01 | PRIMARY IRIDOCYCLITIS |
| 364.02 | RECURRENT IRIDOCYCLITIS |
| 364.03 | SECONDARY IRIDOCYCLITIS, INFECTIOUS |
| 364.04 | SECONDARY IRIDOCYCLITIS, NONINFECTIOUS |
| 364.05 | HYPOPYON |
| 364.1 | CHRONIC IRIDOCYCLITIS |
| 364.10 | CHRONIC IRIDOCYCLITIS, UNSPECIFIED |
| 364.11 | CHRONIC IRIDOCYCLITIS IN DISEASES CLASSIFIED ELSEWHERE |
| 364.2 | CERTAIN TYPES OF IRIDOCYCLITIS |
| 364.21 | FUCHS' HETEROCHROMIC CYCLITIS |
| 364.22 | GLAUCOMATOCYCLITIC CRISES |
| 364.23 | LENS-INDUCED IRIDOCYCLITIS |
| 364.24 | VOGT-KOYANAGI SYNDROME |
| 364.3 | UNSPECIFIED IRIDOCYCLITIS |
| 364.4 | VASCULAR DISORDERS OF IRIS AND CILIARY BODY |
| 364.41 | HYPHEMA OF IRIS AND CILIARY BODY |
| 364.42 | RUBEOSIS IRIDIS |
| 364.5 | DEGENERATIONS OF IRIS AND CILIARY BODY |
| 364.51 | ESSENTIAL OR PROGRESSIVE IRIS ATROPHY |
| 364.52 | IRIDOSCHISIS |
| 364.53 | PIGMENTARY IRIS DEGENERATION |
| 364.54 | DEGENERATION OF PUPILLARY MARGIN |
| 364.55 | MIOTIC CYSTS OF PUPILLARY MARGIN |
| 364.56 | DEGENERATIVE CHANGES OF CHAMBER ANGLE |
| 364.57 | DEGENERATIVE CHANGES OF CILIARY BODY |
| 364.59 | OTHER IRIS ATROPHY |
| 364.6 | CYSTS OF IRIS, CILIARY BODY, AND ANTERIOR CHAMBER |
| 364.60 | IDIOPATHIC CYSTS OF IRIS AND CILIARY BODY |
| 364.61 | IMPLANTATION CYSTS OF IRIS AND CILIARY BODY |
| 364.62 | EXUDATIVE CYSTS OF IRIS OR ANTERIOR CHAMBER |
| 364.63 | PRIMARY CYST OF PARS PLANA |
| 364.64 | EXUDATIVE CYST OF PARS PLANA |
| 364.7 | ADHESIONS AND DISRUPTIONS OF IRIS AND CILIARY BODY |
| 364.70 | ADHESIONS OF IRIS, UNSPECIFIED |
| 364.71 | POSTERIOR SYNECHIAE OF IRIS |
| 364.72 | ANTERIOR SYNECHIAE OF IRIS |
| 364.73 | GONIOSYNECHIAE |
| 364.74 | ADHESIONS AND DISRUPTIONS OF PUPILLARY MEMBRANES |
| 364.75 | PUPILLARY ABNORMALITIES |
| 364.76 | IRIDODIALYSIS |
| 364.77 | RECESSION OF CHAMBER ANGLE OF EYE |
| 364.8 | OTHER DISORDERS OF IRIS AND CILIARY BODY |
| 364.81 | FLOPPY IRIS SYNDROME |
| 364.82 | PLATEAU IRIS SYNDROME |
| 364.89 | OTH DIS IRIS CILIARY BDY |
| 364.9 | UNSPECIFIED DISORDER OF IRIS AND CILIARY BODY |
| 365 | GLAUCOMA |
| 365.0 | BORDERLINE GLAUCOMA (GLAUCOMA SUSPECT) |
| 365.00 | PREGLAUCOMA, UNSPECIFIED |
| 365.01 | OPEN ANGLE WITH BORDERLINE GLAUCOMA FINDINGS |
| 365.02 | ANATOMICAL NARROW ANGLE BORDERLINE GLAUCOMA |
| 365.03 | STEROID RESPONDERS BORDERLINE GLAUCOMA |
| 365.04 | OCULAR HYPERTENSION |
| 365.05 | Open angle with borderline findings, high risk |
| 365.06 | Primary angle closure without glaucoma damage |
| 365.1 | OPEN-ANGLE GLAUCOMA |
| 365.10 | OPEN-ANGLE GLAUCOMA, UNSPECIFIED |
| 365.11 | PRIMARY OPEN ANGLE GLAUCOMA |
| 365.12 | LOW TENSION GLAUCOMA |
| 365.13 | PIGMENTARY GLAUCOMA |
| 365.14 | GLAUCOMA OF CHILDHOOD |
| 365.15 | RESIDUAL STAGE OF OPEN ANGLE GLAUCOMA |
| 365.2 | PRIMARY ANGLE-CLOSURE GLAUCOMA |
| 365.20 | PRIMARY ANGLE-CLOSURE GLAUCOMA, UNSPECIFIED |
| 365.21 | INTERMITTENT ANGLE-CLOSURE GLAUCOMA |
| 365.22 | ACUTE ANGLE-CLOSURE GLAUCOMA |
| 365.23 | CHRONIC ANGLE-CLOSURE GLAUCOMA |
| 365.24 | RESIDUAL STAGE OF ANGLE-CLOSURE GLAUCOMA |
| 365.3 | CORTICOSTEROID-INDUCED GLAUCOMA |
| 365.31 | CORTICOSTEROID-INDUCED GLAUCOMA, GLAUCOMATOUS STAGE |
| 365.32 | CORTICOSTEROID-INDUCED GLAUCOMA, RESIDUAL STAGE |
| 365.4 | GLAUCOMA ASSOCIATED WITH CONGENITAL ANOMALIES, DYSTROPHIES, AND SYSTEMIC SYNDROMES |
| 365.41 | GLAUCOMA ASSOCIATED WITH CHAMBER ANGLE ANOMALIES |
| 365.42 | GLAUCOMA ASSOCIATED WITH ANOMALIES OF IRIS |
| 365.43 | GLAUCOMA ASSOCIATED WITH OTHER ANTERIOR SEGMENT ANOMALIES |
| 365.44 | GLAUCOMA ASSOCIATED WITH SYSTEMIC SYNDROMES |
| 365.5 | GLAUCOMA ASSOCIATED WITH DISORDERS OF THE LENS |
| 365.51 | PHACOLYTIC GLAUCOMA |
| 365.52 | PSEUDOEXFOLIATION GLAUCOMA |
| 365.59 | GLAUCOMA ASSOCIATED WITH OTHER LENS DISORDERS |
| 365.6 | GLAUCOMA ASSOCIATED WITH OTHER OCULAR DISORDERS |
| 365.60 | GLAUCOMA ASSOCIATED WITH UNSPECIFIED OCULAR DISORDER |
| 365.61 | GLAUCOMA ASSOCIATED WITH PUPILLARY BLOCK |
| 365.62 | GLAUCOMA ASSOCIATED WITH OCULAR INFLAMMATIONS |
| 365.63 | GLAUCOMA ASSOCIATED WITH VASCULAR DISORDERS |
| 365.64 | GLAUCOMA ASSOCIATED WITH TUMORS OR CYSTS |
| 365.65 | GLAUCOMA ASSOCIATED WITH OCULAR TRAUMA |
| 365.70 | Glaucoma stage, unspecified |
| 365.71 | Mild stage glaucoma |
| 365.72 | Moderate stage glaucoma |
| 365.73 | Severe stage glaucoma |
| 365.74 | Indeterminate stage glaucoma |
| 365.8 | OTHER SPECIFIED FORMS OF GLAUCOMA |
| 365.81 | HYPERSECRETION GLAUCOMA |
| 365.82 | GLAUCOMA WITH INCREASED EPISCLERAL VENOUS PRESSURE |
| 365.83 | Aqueous misdirection |
| 365.89 | OTHER SPECIFIED GLAUCOMA |
| 365.9 | UNSPECIFIED GLAUCOMA |
| 366 | CATARACT |
| 366.0 | INFANTILE, JUVENILE, AND PRESENILE CATARACT |
| 366.00 | NONSENILE CATARACT, UNSPECIFIED |
| 366.01 | ANTERIOR SUBCAPSULAR POLAR NONSENILE CATARACT |
| 366.02 | POSTERIOR SUBCAPSULAR POLAR NONSENILE CATARACT |
| 366.03 | CORTICAL, LAMELLAR, OR ZONULAR NONSENILE CATARACT |
| 366.04 | NUCLEAR NONSENILE CATARACT |
| 366.09 | OTHER AND COMBINED FORMS OF NONSENILE CATARACT |
| 366.1 | SENILE CATARACT |
| 366.10 | SENILE CATARACT, UNSPECIFIED |
| 366.11 | PSEUDOEXFOLIATION OF LENS CAPSULE |
| 366.12 | INCIPIENT SENILE CATARACT |
| 366.13 | ANTERIOR SUBCAPSULAR POLAR SENILE CATARACT |
| 366.14 | POSTERIOR SUBCAPSULAR POLAR SENILE CATARACT |
| 366.15 | CORTICAL SENILE CATARACT |
| 366.16 | SENILE NUCLEAR SCLEROSIS |
| 366.17 | TOTAL OR MATURE CATARACT |
| 366.18 | HYPERMATURE CATARACT |
| 366.19 | OTHER AND COMBINED FORMS OF SENILE CATARACT |
| 366.2 | TRAUMATIC CATARACT |
| 366.20 | TRAUMATIC CATARACT, UNSPECIFIED |
| 366.21 | LOCALIZED TRAUMATIC OPACITIES |
| 366.22 | TOTAL TRAUMATIC CATARACT |
| 366.23 | PARTIALLY RESOLVED TRAUMATIC CATARACT |
| 366.3 | CATARACT SECONDARY TO OCULAR DISORDERS |
| 366.30 | CATARACTA COMPLICATA, UNSPECIFIED |
| 366.31 | CATARACT SECONDARY TO GLAUCOMATOUS FLECKS (SUBCAPSULAR) |
| 366.32 | CATARACT IN INFLAMMATORY OCULAR DISORDERS |
| 366.33 | CATARACT WITH OCULAR NEOVASCULARIZATION |
| 366.34 | CATARACT IN DEGENERATIVE OCULAR DISORDERS |
| 366.4 | CATARACT ASSOCIATED WITH OTHER DISORDERS |
| 366.41 | DIABETIC CATARACT |
| 366.42 | TETANIC CATARACT |
| 366.43 | MYOTONIC CATARACT |
| 366.44 | CATARACT ASSOCIATED WITH OTHER SYNDROMES |
| 366.45 | TOXIC CATARACT |
| 366.46 | CATARACT ASSOCIATED WITH RADIATION AND OTHER PHYSICAL INFLUENCES |
| 366.5 | AFTER-CATARACT |
| 366.50 | AFTER-CATARACT, UNSPECIFIED |
| 366.51 | SOEMMERING'S RING |
| 366.52 | OTHER AFTER-CATARACT, NOT OBSCURING VISION |
| 366.53 | AFTER-CATARACT, OBSCURING VISION |
| 366.8 | OTHER CATARACT |
| 366.9 | UNSPECIFIED CATARACT |
| 367 | DISORDERS OF REFRACTION AND ACCOMMODATION |
| 367.0 | HYPERMETROPIA |
| 367.1 | MYOPIA |
| 367.2 | ASTIGMATISM |
| 367.20 | ASTIGMATISM, UNSPECIFIED |
| 367.21 | REGULAR ASTIGMATISM |
| 367.22 | IRREGULAR ASTIGMATISM |
| 367.3 | ANISOMETROPIA AND ANISEIKONIA |
| 367.31 | ANISOMETROPIA |
| 367.32 | ANISEIKONIA |
| 367.4 | PRESBYOPIA |
| 367.5 | DISORDERS OF ACCOMMODATION |
| 367.51 | PARESIS OF ACCOMMODATION |
| 367.52 | TOTAL OR COMPLETE INTERNAL OPHTHALMOPLEGIA |
| 367.53 | SPASM OF ACCOMMODATION |
| 367.8 | OTHER DISORDERS OF REFRACTION AND ACCOMMODATION |
| 367.81 | TRANSIENT REFRACTIVE CHANGE |
| 367.89 | OTHER DISORDERS OF REFRACTION AND ACCOMMODATION |
| 367.9 | UNSPECIFIED DISORDER OF REFRACTION AND ACCOMMODATION |
| 368 | VISUAL DISTURBANCES |
| 368.0 | AMBLYOPIA EX ANOPSIA |
| 368.00 | AMBLYOPIA, UNSPECIFIED |
| 368.01 | STRABISMIC AMBLYOPIA |
| 368.02 | DEPRIVATION AMBLYOPIA |
| 368.03 | REFRACTIVE AMBLYOPIA |
| 368.1 | SUBJECTIVE VISUAL DISTURBANCES |
| 368.10 | SUBJECTIVE VISUAL DISTURBANCE, UNSPECIFIED |
| 368.11 | SUDDEN VISUAL LOSS |
| 368.12 | TRANSIENT VISUAL LOSS |
| 368.13 | VISUAL DISCOMFORT |
| 368.14 | VISUAL DISTORTIONS OF SHAPE AND SIZE |
| 368.15 | OTHER VISUAL DISTORTIONS AND ENTOPTIC PHENOMENA |
| 368.16 | PSYCHOPHYSICAL VISUAL DISTURBANCES |
| 368.2 | DIPLOPIA |
| 368.3 | OTHER DISORDERS OF BINOCULAR VISION |
| 368.30 | BINOCULAR VISION DISORDER, UNSPECIFIED |
| 368.31 | SUPPRESSION OF BINOCULAR VISION |
| 368.32 | SIMULTANEOUS VISUAL PERCEPTION WITHOUT FUSION |
| 368.33 | FUSION WITH DEFECTIVE STEREOPSIS |
| 368.34 | ABNORMAL RETINAL CORRESPONDENCE |
| 368.4 | VISUAL FIELD DEFECTS |
| 368.40 | VISUAL FIELD DEFECT, UNSPECIFIED |
| 368.41 | SCOTOMA INVOLVING CENTRAL AREA |
| 368.42 | SCOTOMA OF BLIND SPOT AREA |
| 368.43 | SECTOR OR ARCUATE VISUAL FIELD DEFECTS |
| 368.44 | OTHER LOCALIZED VISUAL FIELD DEFECT |
| 368.45 | GENERALIZED VISUAL FIELD CONTRACTION OR CONSTRICTION |
| 368.46 | HOMONYMOUS BILATERAL FIELD DEFECTS |
| 368.47 | HETERONYMOUS BILATERAL FIELD DEFECTS |
| 368.5 | COLOR VISION DEFICIENCIES |
| 368.51 | PROTAN DEFECT |
| 368.52 | DEUTAN DEFECT |
| 368.53 | TRITAN DEFECT |
| 368.54 | ACHROMATOPSIA |
| 368.55 | ACQUIRED COLOR VISION DEFICIENCIES |
| 368.59 | OTHER COLOR VISION DEFICIENCIES |
| 368.6 | NIGHT BLINDNESS |
| 368.60 | NIGHT BLINDNESS, UNSPECIFIED |
| 368.61 | CONGENITAL NIGHT BLINDNESS |
| 368.62 | ACQUIRED NIGHT BLINDNESS |
| 368.63 | ABNORMAL DARK ADAPTATION CURVE |
| 368.69 | OTHER NIGHT BLINDNESS |
| 368.8 | OTHER SPECIFIED VISUAL DISTURBANCES |
| 368.9 | UNSPECIFIED VISUAL DISTURBANCE |
| 369 | BLINDNESS AND LOW VISION |
| 369.0 | PROFOUND VISION IMPAIRMENT, BOTH EYES |
| 369.00 | BLINDNESS OF BOTH EYES, IMPAIRMENT LEVEL NOT FURTHER SPECIFIED |
| 369.01 | BETTER EYE: TOTAL VISION IMPAIRMENT; LESSER EYE: TOTAL VISION IMPAIRMENT |
| 369.02 | BETTER EYE: NEAR-TOTAL VISION IMPAIRMENT; LESSER EYE: NOT FURTHER SPECIFIED |
| 369.03 | BETTER EYE: NEAR-TOTAL VISION IMPAIRMENT; LESSER EYE: TOTAL VISION IMPAIRMENT |
| 369.04 | BETTER EYE: NEAR-TOTAL VISION IMPAIRMENT; LESSER EYE: NEAR-TOTAL VISION IMPAIRMENT |
| 369.05 | BETTER EYE: PROFOUND VISION IMPAIRMENT; LESSER EYE: NOT FURTHER SPECIFIED |
| 369.06 | BETTER EYE: PROFOUND VISION IMPAIRMENT; LESSER EYE: TOTAL VISION IMPAIRMENT |
| 369.07 | BETTER EYE: PROFOUND VISION IMPAIRMENT; LESSER EYE: NEAR-TOTAL VISION IMPAIRMENT |
| 369.08 | BETTER EYE: PROFOUND VISION IMPAIRMENT; LESSER EYE: PROFOUND VISION IMPAIRMENT |
| 369.1 | MODERATE OR SEVERE VISION IMPAIRMENT, BETTER EYE; PROFOUND VISION IMPAIRMENT OF LESSER EYE |
| 369.10 | BLINDNESS, ONE EYE; LOW VISION OTHER EYE |
| 369.11 | BETTER EYE: SEVERE VISION IMPAIRMENT; LESSER EYE: BLIND, NOT FURTHER SPECIFIED |
| 369.12 | BETTER EYE: SEVERE VISION IMPAIRMENT; LESSER EYE: TOTAL VISION IMPAIRMENT |
| 369.13 | BETTER EYE: SEVERE VISION IMPAIRMENT; LESSER EYE: NEAR-TOTAL VISION IMPAIRMENT |
| 369.14 | BETTER EYE: SEVERE VISION IMPAIRMENT; LESSER EYE: PROFOUND VISION IMPAIRMENT |
| 369.15 | BETTER EYE: MODERATE VISION IMPAIRMENT; LESSER EYE: BLIND, NOT FURTHER SPECIFIED |
| 369.16 | BETTER EYE: MODERATE VISION IMPAIRMENT; LESSER EYE: TOTAL VISION IMPAIRMENT |
| 369.17 | BETTER EYE: MODERATE VISION IMPAIRMENT; LESSER EYE: NEAR-TOTAL VISION IMPAIRMENT |
| 369.18 | BETTER EYE: MODERATE VISION IMPAIRMENT; LESSER EYE: PROFOUND VISION IMPAIRMENT |
| 369.2 | MODERATE OR SEVERE VISION IMPAIRMENT, BOTH EYES |
| 369.20 | LOW VISION, BOTH EYES, NOT OTHERWISE SPECIFIED |
| 369.21 | BETTER EYE: SEVERE VISION IMPAIRMENT; LESSER EYE; IMPAIRMENT NOT FURTHER SPECIFIED |
| 369.22 | BETTER EYE: SEVERE VISION IMPAIRMENT; LESSER EYE: SEVERE VISION IMPAIRMENT |
| 369.23 | BETTER EYE: MODERATE VISION IMPAIRMENT; LESSER EYE: IMPAIRMENT NOT FURTHER SPECIFIED |
| 369.24 | BETTER EYE: MODERATE VISION IMPAIRMENT; LESSER EYE: SEVERE VISION IMPAIRMENT |
| 369.25 | BETTER EYE: MODERATE VISION IMPAIRMENT; LESSER EYE: MODERATE VISION IMPAIRMENT |
| 369.3 | UNQUALIFIED VISUAL LOSS, BOTH EYES |
| 369.4 | LEGAL BLINDNESS, AS DEFINED IN U.S.A. |
| 369.6 | PROFOUND VISION IMPAIRMENT, ONE EYE |
| 369.60 | BLINDNESS, ONE EYE, NOT OTHERWISE SPECIFIED |
| 369.61 | ONE EYE: TOTAL VISION IMPAIRMENT; OTHER EYE: NOT SPECIFIED |
| 369.62 | ONE EYE: TOTAL VISION IMPAIRMENT; OTHER EYE: NEAR-NORMAL VISION |
| 369.63 | ONE EYE: TOTAL VISION IMPAIRMENT; OTHER EYE: NORMAL VISION |
| 369.64 | ONE EYE: NEAR-TOTAL VISION IMPAIRMENT; OTHER EYE: VISION NOT SPECIFIED |
| 369.65 | ONE EYE: NEAR-TOTAL VISION IMPAIRMENT; OTHER EYE: NEAR-NORMAL VISION |
| 369.66 | ONE EYE: NEAR-TOTAL VISION IMPAIRMENT; OTHER EYE: NORMAL VISION |
| 369.67 | ONE EYE: PROFOUND VISION IMPAIRMENT; OTHER EYE: VISION NOT SPECIFIED |
| 369.68 | ONE EYE: PROFOUND VISION IMPAIRMENT; OTHER EYE: NEAR-NORMAL VISION |
| 369.69 | ONE EYE: PROFOUND VISION IMPAIRMENT; OTHER EYE: NORMAL VISION |
| 369.7 | MODERATE OR SEVERE VISION IMPAIRMENT, ONE EYE |
| 369.70 | LOW VISION, ONE EYE, NOT OTHERWISE SPECIFIED |
| 369.71 | ONE EYE: SEVERE VISION IMPAIRMENT; OTHER EYE: VISION NOT SPECIFIED |
| 369.72 | ONE EYE: SEVERE VISION IMPAIRMENT; OTHER EYE: NEAR-NORMAL VISION |
| 369.73 | ONE EYE: SEVERE VISION IMPAIRMENT; OTHER EYE: NORMAL VISION |
| 369.74 | ONE EYE: MODERATE VISION IMPAIRMENT; OTHER EYE: VISION NOT SPECIFIED |
| 369.75 | ONE EYE: MODERATE VISION IMPAIRMENT; OTHER EYE: NEAR-NORMAL VISION |
| 369.76 | ONE EYE: MODERATE VISION IMPAIRMENT; OTHER EYE: NORMAL VISION |
| 369.8 | UNQUALIFIED VISUAL LOSS, ONE EYE |
| 369.9 | UNSPECIFIED VISUAL LOSS |
| 370 | KERATITIS |
| 370.0 | CORNEAL ULCER |
| 370.00 | CORNEAL ULCER, UNSPECIFIED |
| 370.01 | MARGINAL CORNEAL ULCER |
| 370.02 | RING CORNEAL ULCER |
| 370.03 | CENTRAL CORNEAL ULCER |
| 370.04 | HYPOPYON ULCER |
| 370.05 | MYCOTIC CORNEAL ULCER |
| 370.06 | PERFORATED CORNEAL ULCER |
| 370.07 | MOOREN'S ULCER |
| 370.2 | SUPERFICIAL KERATITIS WITHOUT CONJUNCTIVITIS |
| 370.20 | SUPERFICIAL KERATITIS, UNSPECIFIED |
| 370.21 | PUNCTATE KERATITIS |
| 370.22 | MACULAR KERATITIS |
| 370.23 | FILAMENTARY KERATITIS |
| 370.24 | PHOTOKERATITIS |
| 370.3 | CERTAIN TYPES OF KERATOCONJUNCTIVITIS |
| 370.31 | PHLYCTENULAR KERATOCONJUNCTIVITIS |
| 370.32 | LIMBAR AND CORNEAL INVOLVEMENT IN VERNAL CONJUNCTIVITIS |
| 370.33 | KERATOCONJUNCTIVITIS SICCA, NOT SPECIFIED AS SJOGREN'S |
| 370.34 | EXPOSURE KERATOCONJUNCTIVITIS |
| 370.35 | NEUROTROPHIC KERATOCONJUNCTIVITIS |
| 370.4 | OTHER AND UNSPECIFIED KERATOCONJUNCTIVITIS |
| 370.40 | KERATOCONJUNCTIVITIS, UNSPECIFIED |
| 370.44 | KERATITIS OR KERATOCONJUNCTIVITIS IN EXANTHEMA |
| 370.49 | OTHER KERATOCONJUNCTIVITIS |
| 370.5 | INTERSTITIAL AND DEEP KERATITIS |
| 370.50 | INTERSTITIAL KERATITIS, UNSPECIFIED |
| 370.52 | DIFFUSE INTERSTITIAL KERATITIS |
| 370.54 | SCLEROSING KERATITIS |
| 370.55 | CORNEAL ABSCESS |
| 370.59 | OTHER INTERSTITIAL AND DEEP KERATITIS |
| 370.6 | CORNEAL NEOVASCULARIZATION |
| 370.60 | CORNEAL NEOVASCULARIZATION, UNSPECIFIED |
| 370.61 | LOCALIZED VASCULARIZATION OF CORNEA |
| 370.62 | PANNUS (CORNEAL) |
| 370.63 | DEEP VASCULARIZATION OF CORNEA |
| 370.64 | GHOST VESSELS (CORNEAL) |
| 370.8 | OTHER FORMS OF KERATITIS |
| 370.9 | UNSPECIFIED KERATITIS |
| 371 | CORNEAL OPACITY AND OTHER DISORDERS OF CORNEA |
| 371.0 | CORNEAL SCARS AND OPACITIES |
| 371.00 | CORNEAL OPACITY, UNSPECIFIED |
| 371.01 | MINOR OPACITY OF CORNEA |
| 371.02 | PERIPHERAL OPACITY OF CORNEA |
| 371.03 | CENTRAL OPACITY OF CORNEA |
| 371.04 | ADHERENT LEUCOMA |
| 371.05 | PHTHISICAL CORNEA |
| 371.1 | CORNEAL PIGMENTATIONS AND DEPOSITS |
| 371.10 | CORNEAL DEPOSIT, UNSPECIFIED |
| 371.11 | ANTERIOR CORNEAL PIGMENTATIONS |
| 371.12 | STROMAL CORNEAL PIGMENTATIONS |
| 371.13 | POSTERIOR CORNEAL PIGMENTATIONS |
| 371.14 | KAYSER-FLEISCHER RING |
| 371.15 | OTHER CORNEAL DEPOSITS ASSOCIATED WITH METABOLIC DISORDERS |
| 371.16 | ARGENTOUS CORNEAL DEPOSITS |
| 371.2 | CORNEAL EDEMA |
| 371.20 | CORNEAL EDEMA, UNSPECIFIED |
| 371.21 | IDIOPATHIC CORNEAL EDEMA |
| 371.22 | SECONDARY CORNEAL EDEMA |
| 371.23 | BULLOUS KERATOPATHY |
| 371.24 | CORNEAL EDEMA DUE TO WEARING OF CONTACT LENSES |
| 371.3 | CHANGES OF CORNEAL MEMBRANES |
| 371.30 | CORNEAL MEMBRANE CHANGE, UNSPECIFIED |
| 371.31 | FOLDS AND RUPTURE OF BOWMAN'S MEMBRANE |
| 371.32 | FOLDS IN DESCEMET'S MEMBRANE |
| 371.33 | RUPTURE IN DESCEMET'S MEMBRANE |
| 371.4 | CORNEAL DEGENERATIONS |
| 371.40 | CORNEAL DEGENERATION, UNSPECIFIED |
| 371.41 | SENILE CORNEAL CHANGES |
| 371.42 | RECURRENT EROSION OF CORNEA |
| 371.43 | BAND-SHAPED KERATOPATHY |
| 371.44 | OTHER CALCEROUS DEGENERATIONS OF CORNEA |
| 371.45 | KERATOMALACIA NOS |
| 371.46 | NODULAR DEGENERATION OF CORNEA |
| 371.48 | PERIPHERAL DEGENERATIONS OF CORNEA |
| 371.49 | OTHER CORNEAL DEGENERATIONS |
| 371.5 | HEREDITARY CORNEAL DYSTROPHIES |
| 371.50 | HEREDITARY CORNEAL DYSTROPHY, UNSPECIFIED |
| 371.51 | JUVENILE EPITHELIAL CORNEAL DYSTROPHY |
| 371.52 | OTHER ANTERIOR CORNEAL DYSTROPHIES |
| 371.53 | GRANULAR CORNEAL DYSTROPHY |
| 371.54 | LATTICE CORNEAL DYSTROPHY |
| 371.55 | MACULAR CORNEAL DYSTROPHY |
| 371.56 | OTHER STROMAL CORNEAL DYSTROPHIES |
| 371.57 | ENDOTHELIAL CORNEAL DYSTROPHY |
| 371.58 | OTHER POSTERIOR CORNEAL DYSTROPHIES |
| 371.6 | KERATOCONUS |
| 371.60 | KERATOCONUS, UNSPECIFIED |
| 371.61 | KERATOCONUS, STABLE CONDITION |
| 371.62 | KERATOCONUS, ACUTE HYDROPS |
| 371.7 | OTHER CORNEAL DEFORMITIES |
| 371.70 | CORNEAL DEFORMITY, UNSPECIFIED |
| 371.71 | CORNEAL ECTASIA |
| 371.72 | DESCEMETOCELE |
| 371.73 | CORNEAL STAPHYLOMA |
| 371.8 | OTHER CORNEAL DISORDERS |
| 371.81 | CORNEAL ANESTHESIA AND HYPOESTHESIA |
| 371.82 | CORNEAL DISORDER DUE TO CONTACT LENS |
| 371.89 | OTHER CORNEAL DISORDERS |
| 371.9 | UNSPECIFIED CORNEAL DISORDER |
| 372 | DISORDERS OF CONJUNCTIVA |
| 372.0 | ACUTE CONJUNCTIVITIS |
| 372.00 | ACUTE CONJUNCTIVITIS, UNSPECIFIED |
| 372.01 | SEROUS CONJUNCTIVITIS, EXCEPT VIRAL |
| 372.02 | ACUTE FOLLICULAR CONJUNCTIVITIS |
| 372.03 | OTHER MUCOPURULENT CONJUNCTIVITIS |
| 372.04 | PSEUDOMEMBRANOUS CONJUNCTIVITIS |
| 372.05 | ACUTE ATOPIC CONJUNCTIVITIS |
| 372.06 | AC CHEM CONJUNCTIVITIS |
| 372.1 | CHRONIC CONJUNCTIVITIS |
| 372.10 | CHRONIC CONJUNCTIVITIS, UNSPECIFIED |
| 372.11 | SIMPLE CHRONIC CONJUNCTIVITIS |
| 372.12 | CHRONIC FOLLICULAR CONJUNCTIVITIS |
| 372.13 | VERNAL CONJUNCTIVITIS |
| 372.14 | OTHER CHRONIC ALLERGIC CONJUNCTIVITIS |
| 372.15 | PARASITIC CONJUNCTIVITIS |
| 372.2 | BLEPHAROCONJUNCTIVITIS |
| 372.20 | BLEPHAROCONJUNCTIVITIS, UNSPECIFIED |
| 372.21 | ANGULAR BLEPHAROCONJUNCTIVITIS |
| 372.22 | CONTACT BLEPHAROCONJUNCTIVITIS |
| 372.3 | OTHER AND UNSPECIFIED CONJUNCTIVITIS |
| 372.30 | CONJUNCTIVITIS, UNSPECIFIED |
| 372.31 | ROSACEA CONJUNCTIVITIS |
| 372.33 | CONJUNCTIVITIS IN MUCOCUTANEOUS DISEASE |
| 372.34 | PINGUECULITIS |
| 372.39 | OTHER CONJUNCTIVITIS |
| 372.4 | PTERYGIUM |
| 372.40 | PTERYGIUM, UNSPECIFIED |
| 372.41 | PERIPHERAL PTERYGIUM, STATIONARY |
| 372.42 | PERIPHERAL PTERYGIUM, PROGRESSIVE |
| 372.43 | CENTRAL PTERYGIUM |
| 372.44 | DOUBLE PTERYGIUM |
| 372.45 | RECURRENT PTERYGIUM |
| 372.5 | CONJUNCTIVAL DEGENERATIONS AND DEPOSITS |
| 372.50 | CONJUNCTIVAL DEGENERATION, UNSPECIFIED |
| 372.51 | PINGUECULA |
| 372.52 | PSEUDOPTERYGIUM |
| 372.53 | CONJUNCTIVAL XEROSIS |
| 372.54 | CONJUNCTIVAL CONCRETIONS |
| 372.55 | CONJUNCTIVAL PIGMENTATIONS |
| 372.56 | CONJUNCTIVAL DEPOSITS |
| 372.6 | CONJUNCTIVAL SCARS |
| 372.61 | GRANULOMA OF CONJUNCTIVA |
| 372.62 | LOCALIZED ADHESIONS AND STRANDS OF CONJUNCTIVA |
| 372.63 | SYMBLEPHARON |
| 372.64 | SCARRING OF CONJUNCTIVA |
| 372.7 | CONJUNCTIVAL VASCULAR DISORDERS AND CYSTS |
| 372.71 | HYPEREMIA OF CONJUNCTIVA |
| 372.72 | CONJUNCTIVAL HEMORRHAGE |
| 372.73 | CONJUNCTIVAL EDEMA |
| 372.74 | VASCULAR ABNORMALITIES OF CONJUNCTIVA |
| 372.75 | CONJUNCTIVAL CYSTS |
| 372.8 | OTHER DISORDERS OF CONJUNCTIVA |
| 372.81 | CONJUNCTIVOCHALASIS |
| 372.89 | OTHER DISORDERS OF CONJUNCTIVA |
| 372.9 | UNSPECIFIED DISORDER OF CONJUNCTIVA |
| 373 | INFLAMMATION OF EYELIDS |
| 373.0 | BLEPHARITIS |
| 373.00 | BLEPHARITIS, UNSPECIFIED |
| 373.01 | ULCERATIVE BLEPHARITIS |
| 373.02 | SQUAMOUS BLEPHARITIS |
| 373.1 | HORDEOLUM AND OTHER DEEP INFLAMMATION OF EYELID |
| 373.11 | HORDEOLUM EXTERNUM |
| 373.12 | HORDEOLUM INTERNUM |
| 373.13 | ABSCESS OF EYELID |
| 373.2 | CHALAZION |
| 373.3 | NONINFECTIOUS DERMATOSES OF EYELID |
| 373.31 | ECZEMATOUS DERMATITIS OF EYELID |
| 373.32 | CONTACT AND ALLERGIC DERMATITIS OF EYELID |
| 373.33 | XERODERMA OF EYELID |
| 373.34 | DISCOID LUPUS ERYTHEMATOSUS OF EYELID |
| 373.4 | INFECTIVE DERMATITIS OF EYELID OF TYPES RESULTING IN DEFORMITY |
| 373.5 | OTHER INFECTIVE DERMATITIS OF EYELID |
| 373.6 | PARASITIC INFESTATION OF EYELID |
| 373.8 | OTHER INFLAMMATIONS OF EYELIDS |
| 373.9 | UNSPECIFIED INFLAMMATION OF EYELID |
| 374 | OTHER DISORDERS OF EYELIDS |
| 374.0 | ENTROPION AND TRICHIASIS OF EYELID |
| 374.00 | ENTROPION, UNSPECIFIED |
| 374.01 | SENILE ENTROPION |
| 374.02 | MECHANICAL ENTROPION |
| 374.03 | SPASTIC ENTROPION |
| 374.04 | CICATRICIAL ENTROPION |
| 374.05 | TRICHIASIS OF EYELID WITHOUT ENTROPION |
| 374.1 | ECTROPION |
| 374.10 | ECTROPION, UNSPECIFIED |
| 374.11 | SENILE ECTROPION |
| 374.12 | MECHANICAL ECTROPION |
| 374.13 | SPASTIC ECTROPION |
| 374.14 | CICATRICIAL ECTROPION |
| 374.2 | LAGOPHTHALMOS |
| 374.20 | LAGOPHTHALMOS, UNSPECIFIED |
| 374.21 | PARALYTIC LAGOPHTHALMOS |
| 374.22 | MECHANICAL LAGOPHTHALMOS |
| 374.23 | CICATRICIAL LAGOPHTHALMOS |
| 374.3 | PTOSIS OF EYELID |
| 374.30 | PTOSIS OF EYELID, UNSPECIFIED |
| 374.31 | PARALYTIC PTOSIS |
| 374.32 | MYOGENIC PTOSIS |
| 374.33 | MECHANICAL PTOSIS |
| 374.34 | BLEPHAROCHALASIS |
| 374.4 | OTHER DISORDERS AFFECTING EYELID FUNCTION |
| 374.41 | LID RETRACTION OR LAG |
| 374.43 | ABNORMAL INNERVATION SYNDROME OF EYELID |
| 374.44 | SENSORY DISORDERS OF EYELID |
| 374.45 | OTHER SENSORIMOTOR DISORDERS OF EYELID |
| 374.46 | BLEPHAROPHIMOSIS |
| 374.5 | DEGENERATIVE DISORDERS OF EYELID AND PERIOCULAR AREA |
| 374.50 | DEGENERATIVE DISORDER OF EYELID, UNSPECIFIED |
| 374.51 | XANTHELASMA OF EYELID |
| 374.52 | HYPERPIGMENTATION OF EYELID |
| 374.53 | HYPOPIGMENTATION OF EYELID |
| 374.54 | HYPERTRICHOSIS OF EYELID |
| 374.55 | HYPOTRICHOSIS OF EYELID |
| 374.56 | OTHER DEGENERATIVE DISORDERS OF SKIN AFFECTING EYELID |
| 374.8 | OTHER DISORDERS OF EYELID |
| 374.81 | HEMORRHAGE OF EYELID |
| 374.82 | EDEMA OF EYELID |
| 374.83 | ELEPHANTIASIS OF EYELID |
| 374.84 | CYSTS OF EYELIDS |
| 374.85 | VASCULAR ANOMALIES OF EYELID |
| 374.86 | RETAINED FOREIGN BODY OF EYELID |
| 374.87 | Dermatochalasis |
| 374.89 | OTHER DISORDERS OF EYELID |
| 374.9 | UNSPECIFIED DISORDER OF EYELID |
| 375 | DISORDERS OF LACRIMAL SYSTEM |
| 375.0 | DACRYOADENITIS |
| 375.00 | DACRYOADENITIS, UNSPECIFIED |
| 375.01 | ACUTE DACRYOADENITIS |
| 375.02 | CHRONIC DACRYOADENITIS |
| 375.03 | CHRONIC ENLARGEMENT OF LACRIMAL GLAND |
| 375.1 | OTHER DISORDERS OF LACRIMAL GLAND |
| 375.11 | DACRYOPS |
| 375.12 | OTHER LACRIMAL CYSTS AND CYSTIC DEGENERATION |
| 375.13 | PRIMARY LACRIMAL ATROPHY |
| 375.14 | SECONDARY LACRIMAL ATROPHY |
| 375.15 | TEAR FILM INSUFFICIENCY, UNSPECIFIED |
| 375.16 | DISLOCATION OF LACRIMAL GLAND |
| 375.2 | EPIPHORA |
| 375.20 | EPIPHORA, UNSPECIFIED AS TO CAUSE |
| 375.21 | EPIPHORA DUE TO EXCESS LACRIMATION |
| 375.22 | EPIPHORA DUE TO INSUFFICIENT DRAINAGE |
| 375.3 | ACUTE AND UNSPECIFIED INFLAMMATION OF LACRIMAL PASSAGES |
| 375.30 | DACRYOCYSTITIS, UNSPECIFIED |
| 375.31 | ACUTE CANALICULITIS, LACRIMAL |
| 375.32 | ACUTE DACRYOCYSTITIS |
| 375.33 | PHLEGMONOUS DACRYOCYSTITIS |
| 375.4 | CHRONIC INFLAMMATION OF LACRIMAL PASSAGES |
| 375.41 | CHRONIC CANALICULITIS |
| 375.42 | CHRONIC DACRYOCYSTITIS |
| 375.43 | LACRIMAL MUCOCELE |
| 375.5 | STENOSIS AND INSUFFICIENCY OF LACRIMAL PASSAGES |
| 375.51 | EVERSION OF LACRIMAL PUNCTUM |
| 375.52 | STENOSIS OF LACRIMAL PUNCTUM |
| 375.53 | STENOSIS OF LACRIMAL CANALICULI |
| 375.54 | STENOSIS OF LACRIMAL SAC |
| 375.55 | OBSTRUCTION OF NASOLACRIMAL DUCT, NEONATAL |
| 375.56 | STENOSIS OF NASOLACRIMAL DUCT, ACQUIRED |
| 375.57 | DACRYOLITH |
| 375.6 | OTHER CHANGES OF LACRIMAL PASSAGES |
| 375.61 | LACRIMAL FISTULA |
| 375.69 | OTHER CHANGES OF LACRIMAL PASSAGES |
| 375.8 | OTHER DISORDERS OF LACRIMAL SYSTEM |
| 375.81 | GRANULOMA OF LACRIMAL PASSAGES |
| 375.89 | OTHER DISORDERS OF LACRIMAL SYSTEM |
| 375.9 | UNSPECIFIED DISORDER OF LACRIMAL SYSTEM |
| 376 | DISORDERS OF THE ORBIT |
| 376.0 | ACUTE INFLAMMATION OF ORBIT |
| 376.00 | ACUTE INFLAMMATION OF ORBIT, UNSPECIFIED |
| 376.01 | ORBITAL CELLULITIS |
| 376.02 | ORBITAL PERIOSTITIS |
| 376.03 | ORBITAL OSTEOMYELITIS |
| 376.04 | ORBITAL TENONITIS |
| 376.1 | CHRONIC INFLAMMATORY DISORDERS OF ORBIT |
| 376.10 | CHRONIC INFLAMMATION OF ORBIT, UNSPECIFIED |
| 376.11 | ORBITAL GRANULOMA |
| 376.12 | ORBITAL MYOSITIS |
| 376.13 | PARASITIC INFESTATION OF ORBIT |
| 376.2 | ENDOCRINE EXOPHTHALMOS |
| 376.21 | THYROTOXIC EXOPHTHALMOS |
| 376.22 | EXOPHTHALMIC OPHTHALMOPLEGIA |
| 376.3 | OTHER EXOPHTHALMIC CONDITIONS |
| 376.30 | EXOPHTHALMOS, UNSPECIFIED |
| 376.31 | CONSTANT EXOPHTHALMOS |
| 376.32 | ORBITAL HEMORRHAGE |
| 376.33 | ORBITAL EDEMA OR CONGESTION |
| 376.34 | INTERMITTENT EXOPHTHALMOS |
| 376.35 | PULSATING EXOPHTHALMOS |
| 376.36 | LATERAL DISPLACEMENT OF GLOBE |
| 376.4 | DEFORMITY OF ORBIT |
| 376.40 | DEFORMITY OF ORBIT, UNSPECIFIED |
| 376.41 | HYPERTELORISM OF ORBIT |
| 376.42 | EXOSTOSIS OF ORBIT |
| 376.43 | LOCAL DEFORMITIES OF ORBIT DUE TO BONE DISEASE |
| 376.44 | ORBITAL DEFORMITIES ASSOCIATED WITH CRANIOFACIAL DEFORMITIES |
| 376.45 | ATROPHY OF ORBIT |
| 376.46 | ENLARGEMENT OF ORBIT |
| 376.47 | DEFORMITY OF ORBIT DUE TO TRAUMA OR SURGERY |
| 376.5 | ENOPHTHALMOS |
| 376.50 | ENOPHTHALMOS, UNSPECIFIED AS TO CAUSE |
| 376.51 | ENOPHTHALMOS DUE TO ATROPHY OF ORBITAL TISSUE |
| 376.52 | ENOPHTHALMOS DUE TO TRAUMA OR SURGERY |
| 376.6 | RETAINED (OLD) FOREIGN BODY FOLLOWING PENETRATING WOUND OF ORBIT |
| 376.8 | OTHER ORBITAL DISORDERS |
| 376.81 | ORBITAL CYSTS |
| 376.82 | MYOPATHY OF EXTRAOCULAR MUSCLES |
| 376.89 | OTHER ORBITAL DISORDERS |
| 376.9 | UNSPECIFIED DISORDER OF ORBIT |
| 377 | DISORDERS OF OPTIC NERVE AND VISUAL PATHWAYS |
| 377.0 | PAPILLEDEMA |
| 377.00 | PAPILLEDEMA, UNSPECIFIED |
| 377.01 | PAPILLEDEMA ASSOCIATED WITH INCREASED INTRACRANIAL PRESSURE |
| 377.02 | PAPILLEDEMA ASSOCIATED WITH DECREASED OCULAR PRESSURE |
| 377.03 | PAPILLEDEMA ASSOCIATED WITH RETINAL DISORDER |
| 377.04 | FOSTER-KENNEDY SYNDROME |
| 377.1 | OPTIC ATROPHY |
| 377.10 | OPTIC ATROPHY, UNSPECIFIED |
| 377.11 | PRIMARY OPTIC ATROPHY |
| 377.12 | POSTINFLAMMATORY OPTIC ATROPHY |
| 377.13 | OPTIC ATROPHY ASSOCIATED WITH RETINAL DYSTROPHIES |
| 377.14 | GLAUCOMATOUS ATROPHY (CUPPING) OF OPTIC DISC |
| 377.15 | PARTIAL OPTIC ATROPHY |
| 377.16 | HEREDITARY OPTIC ATROPHY |
| 377.2 | OTHER DISORDERS OF OPTIC DISC |
| 377.21 | DRUSEN OF OPTIC DISC |
| 377.22 | CRATER-LIKE HOLES OF OPTIC DISC |
| 377.23 | COLOBOMA OF OPTIC DISC |
| 377.24 | PSEUDOPAPILLEDEMA |
| 377.3 | OPTIC NEURITIS |
| 377.30 | OPTIC NEURITIS, UNSPECIFIED |
| 377.31 | OPTIC PAPILLITIS |
| 377.32 | RETROBULBAR NEURITIS (ACUTE) |
| 377.33 | NUTRITIONAL OPTIC NEUROPATHY |
| 377.34 | TOXIC OPTIC NEUROPATHY |
| 377.39 | OTHER OPTIC NEURITIS |
| 377.4 | OTHER DISORDERS OF OPTIC NERVE |
| 377.41 | ISCHEMIC OPTIC NEUROPATHY |
| 377.42 | HEMORRHAGE IN OPTIC NERVE SHEATHS |
| 377.43 | OPTIC NERVE HYPOPLASIA |
| 377.49 | OTHER DISORDERS OF OPTIC NERVE |
| 377.5 | DISORDERS OF OPTIC CHIASM |
| 377.51 | DISORDERS OF OPTIC CHIASM ASSOCIATED WITH PITUITARY NEOPLASMS AND DISORDERS |
| 377.52 | DISORDERS OF OPTIC CHIASM ASSOCIATED WITH OTHER NEOPLASMS |
| 377.53 | DISORDERS OF OPTIC CHIASM ASSOCIATED WITH VASCULAR DISORDERS |
| 377.54 | DISORDERS OF OPTIC CHIASM ASSOCIATED WITH INFLAMMATORY DISORDERS |
| 377.6 | DISORDERS OF OTHER VISUAL PATHWAYS |
| 377.61 | DISORDERS OF OTHER VISUAL PATHWAYS ASSOCIATED WITH NEOPLASMS |
| 377.62 | DISORDERS OF OTHER VISUAL PATHWAYS ASSOCIATED WITH VASCULAR DISORDERS |
| 377.63 | DISORDERS OF OTHER VISUAL PATHWAYS ASSOCIATED WITH INFLAMMATORY DISORDERS |
| 377.7 | DISORDERS OF VISUAL CORTEX |
| 377.71 | DISORDERS OF VISUAL CORTEX ASSOCIATED WITH NEOPLASMS |
| 377.72 | DISORDERS OF VISUAL CORTEX ASSOCIATED WITH VASCULAR DISORDERS |
| 377.73 | DISORDERS OF VISUAL CORTEX ASSOCIATED WITH INFLAMMATORY DISORDERS |
| 377.75 | CORTICAL BLINDNESS |
| 377.9 | UNSPECIFIED DISORDER OF OPTIC NERVE AND VISUAL PATHWAYS |
| 378 | STRABISMUS AND OTHER DISORDERS OF BINOCULAR EYE MOVEMENTS |
| 378.0 | ESOTROPIA |
| 378.00 | ESOTROPIA, UNSPECIFIED |
| 378.01 | MONOCULAR ESOTROPIA |
| 378.02 | MONOCULAR ESOTROPIA WITH A PATTERN |
| 378.03 | MONOCULAR ESOTROPIA WITH V PATTERN |
| 378.04 | MONOCULAR ESOTROPIA WITH OTHER NONCOMITANCIES |
| 378.05 | ALTERNATING ESOTROPIA |
| 378.06 | ALTERNATING ESOTROPIA WITH A PATTERN |
| 378.07 | ALTERNATING ESOTROPIA WITH V PATTERN |
| 378.08 | ALTERNATING ESOTROPIA WITH OTHER NONCOMITANCIES |
| 378.1 | EXOTROPIA |
| 378.10 | EXOTROPIA, UNSPECIFIED |
| 378.11 | MONOCULAR EXOTROPIA |
| 378.12 | MONOCULAR EXOTROPIA WITH A PATTERN |
| 378.13 | MONOCULAR EXOTROPIA WITH V PATTERN |
| 378.14 | MONOCULAR EXOTROPIA WITH OTHER NONCOMITANCIES |
| 378.15 | ALTERNATING EXOTROPIA |
| 378.16 | ALTERNATING EXOTROPIA WITH A PATTERN |
| 378.17 | ALTERNATING EXOTROPIA WITH V PATTERN |
| 378.18 | ALTERNATING EXOTROPIA WITH OTHER NONCOMITANCIES |
| 378.2 | INTERMITTENT HETEROTROPIA |
| 378.20 | INTERMITTENT HETEROTROPIA, UNSPECIFIED |
| 378.21 | INTERMITTENT ESOTROPIA, MONOCULAR |
| 378.22 | INTERMITTENT ESOTROPIA, ALTERNATING |
| 378.23 | INTERMITTENT EXOTROPIA, MONOCULAR |
| 378.24 | INTERMITTENT EXOTROPIA, ALTERNATING |
| 378.3 | OTHER AND UNSPECIFIED HETEROTROPIA |
| 378.30 | HETEROTROPIA, UNSPECIFIED |
| 378.31 | HYPERTROPIA |
| 378.32 | HYPOTROPIA |
| 378.33 | CYCLOTROPIA |
| 378.34 | MONOFIXATION SYNDROME |
| 378.35 | ACCOMMODATIVE COMPONENT IN ESOTROPIA |
| 378.4 | HETEROPHORIA |
| 378.40 | HETEROPHORIA, UNSPECIFIED |
| 378.41 | ESOPHORIA |
| 378.42 | EXOPHORIA |
| 378.43 | VERTICAL HETEROPHORIA |
| 378.44 | CYCLOPHORIA |
| 378.45 | ALTERNATING HYPERPHORIA |
| 378.5 | PARALYTIC STRABISMUS |
| 378.50 | PARALYTIC STRABISMUS, UNSPECIFIED |
| 378.51 | THIRD OR OCULOMOTOR NERVE PALSY, PARTIAL |
| 378.52 | THIRD OR OCULOMOTOR NERVE PALSY, TOTAL |
| 378.53 | FOURTH OR TROCHLEAR NERVE PALSY |
| 378.54 | SIXTH OR ABDUCENS NERVE PALSY |
| 378.55 | EXTERNAL OPHTHALMOPLEGIA |
| 378.56 | TOTAL OPHTHALMOPLEGIA |
| 378.6 | MECHANICAL STRABISMUS |
| 378.60 | MECHANICAL STRABISMUS, UNSPECIFIED |
| 378.61 | BROWN'S (TENDON) SHEATH SYNDROME |
| 378.62 | MECHANICAL STRABISMUS FROM OTHER MUSCULOFASCIAL DISORDERS |
| 378.63 | LIMITED DUCTION ASSOCIATED WITH OTHER CONDITIONS |
| 378.7 | OTHER SPECIFIED STRABISMUS |
| 378.71 | DUANE'S SYNDROME |
| 378.72 | PROGRESSIVE EXTERNAL OPHTHALMOPLEGIA |
| 378.73 | STRABISMUS IN OTHER NEUROMUSCULAR DISORDERS |
| 378.8 | OTHER DISORDERS OF BINOCULAR EYE MOVEMENTS |
| 378.81 | PALSY OF CONJUGATE GAZE |
| 378.82 | SPASM OF CONJUGATE GAZE |
| 378.83 | CONVERGENCE INSUFFICIENCY OR PALSY |
| 378.84 | CONVERGENCE EXCESS OR SPASM |
| 378.85 | ANOMALIES OF DIVERGENCE |
| 378.86 | INTERNUCLEAR OPHTHALMOPLEGIA |
| 378.87 | OTHER DISSOCIATED DEVIATION OF EYE MOVEMENTS |
| 378.9 | UNSPECIFIED DISORDER OF EYE MOVEMENTS |
| 379 | OTHER DISORDERS OF EYE |
| 379.0 | SCLERITIS AND EPISCLERITIS |
| 379.00 | SCLERITIS, UNSPECIFIED |
| 379.01 | EPISCLERITIS PERIODICA FUGAX |
| 379.02 | NODULAR EPISCLERITIS |
| 379.03 | ANTERIOR SCLERITIS |
| 379.04 | SCLEROMALACIA PERFORANS |
| 379.05 | SCLERITIS WITH CORNEAL INVOLVEMENT |
| 379.06 | BRAWNY SCLERITIS |
| 379.07 | POSTERIOR SCLERITIS |
| 379.09 | OTHER SCLERITIS |
| 379.1 | OTHER DISORDERS OF SCLERA |
| 379.11 | SCLERAL ECTASIA |
| 379.12 | STAPHYLOMA POSTICUM |
| 379.13 | EQUATORIAL STAPHYLOMA |
| 379.14 | ANTERIOR STAPHYLOMA, LOCALIZED |
| 379.15 | RING STAPHYLOMA |
| 379.16 | OTHER DEGENERATIVE DISORDERS OF SCLERA |
| 379.19 | OTHER SCLERAL DISORDERS |
| 379.2 | DISORDERS OF VITREOUS BODY |
| 379.21 | VITREOUS DEGENERATION |
| 379.22 | CRYSTALLINE DEPOSITS IN VITREOUS |
| 379.23 | VITREOUS HEMORRHAGE |
| 379.24 | OTHER VITREOUS OPACITIES |
| 379.25 | VITREOUS MEMBRANES AND STRANDS |
| 379.26 | VITREOUS PROLAPSE |
| 379.27 | Vitreomacular adhesion |
| 379.29 | OTHER DISORDERS OF VITREOUS |
| 379.3 | APHAKIA AND OTHER DISORDERS OF LENS |
| 379.31 | APHAKIA |
| 379.32 | SUBLUXATION OF LENS |
| 379.33 | ANTERIOR DISLOCATION OF LENS |
| 379.34 | POSTERIOR DISLOCATION OF LENS |
| 379.39 | OTHER DISORDERS OF LENS |
| 379.4 | ANOMALIES OF PUPILLARY FUNCTION |
| 379.40 | ABNORMAL PUPILLARY FUNCTION, UNSPECIFIED |
| 379.41 | ANISOCORIA |
| 379.42 | MIOSIS (PERSISTENT), NOT DUE TO MIOTICS |
| 379.43 | MYDRIASIS (PERSISTENT), NOT DUE TO MYDRIATICS |
| 379.45 | ARGYLL ROBERTSON PUPIL, ATYPICAL |
| 379.46 | TONIC PUPILLARY REACTION |
| 379.49 | OTHER ANOMALIES OF PUPILLARY FUNCTION |
| 379.5 | NYSTAGMUS AND OTHER IRREGULAR EYE MOVEMENTS |
| 379.50 | NYSTAGMUS, UNSPECIFIED |
| 379.51 | CONGENITAL NYSTAGMUS |
| 379.52 | LATENT NYSTAGMUS |
| 379.53 | VISUAL DEPRIVATION NYSTAGMUS |
| 379.54 | NYSTAGMUS ASSOCIATED WITH DISORDERS OF THE VESTIBULAR SYSTEM |
| 379.55 | DISSOCIATED NYSTAGMUS |
| 379.56 | OTHER FORMS OF NYSTAGMUS |
| 379.57 | DEFICIENCIES OF SACCADIC EYE MOVEMENTS |
| 379.58 | DEFICIENCIES OF SMOOTH PURSUIT MOVEMENTS |
| 379.59 | OTHER IRREGULARITIES OF EYE MOVEMENTS |
| 379.6 | INFLAM POSTPROCEDUR BLEB |
| 379.60 | "INFLAMMATION (INFECTION) OF POSTPROCEDURAL BLEB |
| 379.61 | "INFLAMMATION (INFECTION) OF POSTPROCEDURAL BLEB |
| 379.62 | "INFLAMMATION (INFECTION) OF POSTPROCEDURAL BLEB |
| 379.63 | "INFLAMMATION (INFECTION) OF POSTPROCEDURAL BLEB |
| 379.8 | OTHER SPECIFIED DISORDERS OF EYE AND ADNEXA |
| 379.9 | UNSPECIFIED DISORDER OF EYE AND ADNEXA |
| 379.90 | DISORDER OF EYE, UNSPECIFIED |
| 379.91 | PAIN IN OR AROUND EYE |
| 379.92 | SWELLING OR MASS OF EYE |
| 379.93 | REDNESS OR DISCHARGE OF EYE |
| 379.99 | OTHER ILL-DEFINED DISORDERS OF EYE |
| 743.0 | ANOPHTHALMOS |
| 743.00 | CLINICAL ANOPHTHALMOS, UNSPECIFIED |
| 743.03 | CYSTIC EYEBALL, CONGENITAL |
| 743.06 | CRYPTOPHTHALMOS |
| 743.1 | MICROPHTHALMOS |
| 743.10 | MICROPHTHALMOS, UNSPECIFIED |
| 743.11 | SIMPLE MICROPHTHALMOS |
| 743.12 | MICROPHTHALMOS ASSOCIATED WITH OTHER ANOMALIES OF EYE AND ADNEXA |
| 743.2 | BUPHTHALMOS |
| 743.20 | BUPHTHALMOS, UNSPECIFIED |
| 743.21 | SIMPLE BUPHTHALMOS |
| 743.22 | BUPHTHALMOS ASSOCIATED WITH OTHER OCULAR ANOMALIES |
| 743.3 | CONGENITAL CATARACT AND LENS ANOMALIES |
| 743.30 | CONGENITAL CATARACT, UNSPECIFIED |
| 743.31 | CONGENITAL CAPSULAR AND SUBCAPSULAR CATARACT |
| 743.32 | CONGENITAL CORTICAL AND ZONULAR CATARACT |
| 743.33 | CONGENITAL NUCLEAR CATARACT |
| 743.34 | CONGENITAL TOTAL AND SUBTOTAL CATARACT |
| 743.35 | CONGENITAL APHAKIA |
| 743.36 | CONGENITAL ANOMALIES OF LENS SHAPE |
| 743.37 | CONGENITAL ECTOPIC LENS |
| 743.39 | OTHER CONGENITAL CATARACT AND LENS ANOMALIES |
| 743.4 | COLOBOMA AND OTHER ANOMALIES OF ANTERIOR SEGMENT |
| 743.41 | CONGENITAL ANOMALIES OF CORNEAL SIZE AND SHAPE |
| 743.42 | CONGENITAL CORNEAL OPACITIES, INTERFERING WITH VISION |
| 743.43 | OTHER CONGENITAL CORNEAL OPACITIES |
| 743.44 | SPECIFIED CONGENITAL ANOMALIES OF ANTERIOR CHAMBER, CHAMBER ANGLE, AND RELATED STRUCTURES |
| 743.45 | ANIRIDIA |
| 743.46 | OTHER SPECIFIED CONGENITAL ANOMALIES OF IRIS AND CILIARY BODY |
| 743.47 | SPECIFIED CONGENITAL ANOMALIES OF SCLERA |
| 743.48 | MULTIPLE AND COMBINED CONGENITAL ANOMALIES OF ANTERIOR SEGMENT |
| 743.49 | OTHER CONGENITAL ANOMALIES OF ANTERIOR SEGMENT |
| 743.5 | CONGENITAL ANOMALIES OF POSTERIOR SEGMENT |
| 743.51 | VITREOUS ANOMALIES, CONGENITAL |
| 743.52 | FUNDUS COLOBOMA |
| 743.53 | CHORIORETINAL DEGENERATION, CONGENITAL |
| 743.54 | CONGENITAL FOLDS AND CYSTS OF POSTERIOR SEGMENT |
| 743.55 | CONGENITAL MACULAR CHANGES |
| 743.56 | OTHER RETINAL CHANGES, CONGENITAL |
| 743.57 | SPECIFIED CONGENITAL ANOMALIES OF OPTIC DISC |
| 743.58 | VASCULAR ANOMALIES, CONGENITAL |
| 743.59 | OTHER CONGENITAL ANOMALIES OF POSTERIOR SEGMENT |
| 743.6 | CONGENITAL ANOMALIES OF EYELIDS, LACRIMAL SYSTEM, AND ORBIT |
| 743.61 | CONGENITAL PTOSIS OF EYELID |
| 743.62 | CONGENITAL DEFORMITIES OF EYELIDS |
| 743.63 | OTHER SPECIFIED CONGENITAL ANOMALIES OF EYELID |
| 743.64 | SPECIFIED CONGENITAL ANOMALIES OF LACRIMAL GLAND |
| 743.65 | SPECIFIED CONGENITAL ANOMALIES OF LACRIMAL PASSAGES |
| 743.66 | SPECIFIED CONGENITAL ANOMALIES OF ORBIT |
| 743.69 | OTHER CONGENITAL ANOMALIES OF EYELIDS, LACRIMAL SYSTEM, AND ORBIT |
| 743.8 | OTHER SPECIFIED ANOMALIES OF EYE, CONGENITAL |
| 743.9 | UNSPECIFIED ANOMALY OF EYE, CONGENITAL |
| 771.6 | NEONATAL CONJUNCTIVITIS AND DACRYOCYSTITIS |
